# Supplementary material for: Improving primary prevention of acute rheumatic fever in Australia: consensus primary care priorities identified through an eDelphi process
Source: PubMed Central journal article supplement — BMJ Open. 2022 Mar 9;12(3):e056239. doi: 10.1136/bmjopen-2021-056239 (PMC8915338; doi:10.1136/bmjopen-2021-056239), 2022-03-09
Supplement: bmjopen-2021-056239supp001.pdf [file bmjopen-2021-056239supp001.pdf]

**Supplementary material 1 – Search strategy**

((rheumatic[All Fields] AND ("fever"[MeSH Terms] OR "fever"[All Fields])) AND ("prevention and control"[Subheading] OR ("prevention"[All Fields] AND "control"[All Fields]) OR "prevention and control"[All Fields] OR "prevention"[All Fields])) AND ("Australia"[MeSH Terms] OR "Australia"[All Fields])

((Rheumatic Fever [MeSH Terms] OR rheumatic fever.mp) AND (exp Primary prevention [MeSH Terms]) AND ((exp Australia [MeSH Terms]) OR (exp New Zealand (MeSH Terms))).
