# Supplementary material for: Improving primary prevention of acute rheumatic fever in Australia: consensus primary care priorities identified through an eDelphi process
Source: PubMed Central journal article supplement — BMJ Open. 2022 Mar 9;12(3):e056239. doi: 10.1136/bmjopen-2021-056239 (PMC8915338; doi:10.1136/bmjopen-2021-056239), 2022-03-09
Supplement: bmjopen-2021-056239supp002.pdf [file bmjopen-2021-056239supp002.pdf]

## Supplementary material 2 – Scoping focus group outcomes

### Supply side

#### *Approachability (transparency, outreach, information, screening)*

- School sore throat screening

#### *Availability and accommodation (geographic location, accommodation, hours of opening, appointment mechanisms)*

- Develop framework for external diagnosis done with photography of skin sores (for remote communities)
- Use telehealth for videoing diagnosis

#### *Acceptability (professional values, norms, culture, gender)*

- Develop sustainable training for AHWs
- Integrate AHWs into health system to better work alongside other health centre staff
- Address staff turnover at AMSs
- Deliver training + education of health care workers + school nurses for diagnosis + treatment of sore throat + skin sores
- Provide meaningful feedback to nurses re: clinic progress
- Provide systematic support and encouragement for clinic staff

#### *Affordability (direct costs, indirect costs, opportunity costs)*

- Provide affordable/free bandaids/bandages at school

#### *Appropriateness (technical and interpersonal quality, adequacy, coordination and continuity)*

- Include appropriate traditional remedies in health promotion campaigns, e.g. honey
- Develop clinical decision rules for sore throat
- Introduce affordable "point of care" testing for Strep A in skin sore and sore throat

### Demand side

#### *Ability to perceive (health literacy, health beliefs)*

- Raise awareness of germ theory
- Raise awareness of transmission through bed sharing - provide better advice (top to tail)
- Improve baseline education - teach children about skin sores and sore throat
- Raise awareness in highest risk populations and target highest risk kids/families
- Raise awareness in school settings
- Raise awareness of hand washing and hand hygiene through school programs
- Raise awareness around prevention of transmission through open skin sores
- Run comprehensive health promotion campaign
- Raise awareness of need for skin sores to seal over
- Raise awareness of daily washing (parents and schools), particularly in first year of life
- Raise awareness re: reinfection rather than ineffective treatment
- Run comprehensive health promotion campaign
- Improve health seeking behaviour for skin sores and sore throat

#### *Ability to seek (personal and social values, culture, gender, autonomy)*

- Address stigma associated with sore throat, to improve acceptability of seeking health care
