# Supplementary material for: Improving primary prevention of acute rheumatic fever in Australia: consensus primary care priorities identified through an eDelphi process
Source: PubMed Central journal article supplement — BMJ Open. 2022 Mar 9;12(3):e056239. doi: 10.1136/bmjopen-2021-056239 (PMC8915338; doi:10.1136/bmjopen-2021-056239), 2022-03-09
Supplement: bmjopen-2021-056239supp004.pdf [file bmjopen-2021-056239supp004.pdf]

## Supplementary 4 – Detailed summary of eDelphi outcomes

| eDelphi Priorities for improving primary prevention of ARF   Summary of results<br>Presented in order of % rated high priority by participants<br>Endorsed concepts, endorsed strategies, endorsed actions and elements not endorsed<br>*Indicates item added in Round 2 based on Round 1 feedback from participants<br>♦Indicates concept which was re-rated in Round 2 based on intermediate Round 1 feedback from participants<br>(Items in brackets indicate strategies which were the same as concepts and were not presented to participants through the REDCap database to avoid duplication but retained for structural consistency) | Number of responses | Number rated as high priority (4 or 5) | %4 or 5 |
|----------------------------------------------------------------------------------------------------------------------------------------------------------------------------------------------------------------------------------------------------------------------------------------------------------------------------------------------------------------------------------------------------------------------------------------------------------------------------------------------------------------------------------------------------------------------------------------------------------------------------------------------|---------------------|----------------------------------------|---------|
| <b>Concept</b> Engage communities at risk of ARF in preventing the disease                                                                                                                                                                                                                                                                                                                                                                                                                                                                                                                                                                   | 21                  | 20                                     | 95      |
| <b>(Strategy</b> Engage communities at risk of ARF in preventing the disease)                                                                                                                                                                                                                                                                                                                                                                                                                                                                                                                                                                | 21                  | 20                                     | 95      |
| <b>Action</b> Support community leaders to develop and facilitate key messages about sore throat and skin sores                                                                                                                                                                                                                                                                                                                                                                                                                                                                                                                              | 19                  | 15                                     | 79      |
| <b>Action</b> Share positive local stories about good news examples of treating skin sores/sore throat                                                                                                                                                                                                                                                                                                                                                                                                                                                                                                                                       | 19                  | 12                                     | 73      |
| <b>Strategy*</b> Engage communities by addressing attitudes to skin sores and sore throat including reducing stigma and de-normalising sores                                                                                                                                                                                                                                                                                                                                                                                                                                                                                                 | 16                  | 16                                     | 100     |
| <b>Strategy*</b> Engage communities by improving access to local information about the rates of Strep A infection, ARF and RHD                                                                                                                                                                                                                                                                                                                                                                                                                                                                                                               | 16                  | 11                                     | 69      |
| <b>Concept</b> Activate or empower people to seek health services for skin sores and sore throat                                                                                                                                                                                                                                                                                                                                                                                                                                                                                                                                             | 20                  | 17                                     | 85      |
| <b>Strategy</b> Encourage people to actively seek assessment/treatment of skin sores                                                                                                                                                                                                                                                                                                                                                                                                                                                                                                                                                         | 17                  | 16                                     | 94      |
| <b>Action</b> Train parents and caregivers to ask for recommended assessment of skin sores/sore throat                                                                                                                                                                                                                                                                                                                                                                                                                                                                                                                                       | 16                  | 14                                     | 88      |
| <b>Action</b> Train or support children on how to ask for their sore throat/skin sores to be assessed/treated                                                                                                                                                                                                                                                                                                                                                                                                                                                                                                                                | 16                  | 13                                     | 75      |
| <b>Action</b> Develop the idea of a 'skin check' visit that people can ask for when they attend clinic                                                                                                                                                                                                                                                                                                                                                                                                                                                                                                                                       | 16                  | 11                                     | 69      |
| <b>Strategy*</b> Provide health services for skin sores and sore throat at schools                                                                                                                                                                                                                                                                                                                                                                                                                                                                                                                                                           | 16                  | 14                                     | 88      |
| <b>Strategy*</b> Invite people to suggest strategies for reducing their own risk of skin sores/sore throat                                                                                                                                                                                                                                                                                                                                                                                                                                                                                                                                   | 16                  | 11                                     | 69      |
| <b>Concept</b> Support people at risk of ARF/RHD to be engaged in their own health care and self-management                                                                                                                                                                                                                                                                                                                                                                                                                                                                                                                                  | 20                  | 17                                     | 85      |
| <b>Strategy</b> Support engagement by involving community in delivery of health care                                                                                                                                                                                                                                                                                                                                                                                                                                                                                                                                                         | 17                  | 16                                     | 94      |
| <b>Action</b> Ensure community control of health care services in communities with a high burden of ARF or RHD                                                                                                                                                                                                                                                                                                                                                                                                                                                                                                                               | 16                  | 14                                     | 88      |
| <b>Strategy</b> Support people seeking care to engage with assessment and treatment of skin sores and sore throat                                                                                                                                                                                                                                                                                                                                                                                                                                                                                                                            | 17                  | 15                                     | 88      |
| <b>Action</b> Provide training or support for people in communities with a high burden of ARF or RHD to be empowered health care consumers                                                                                                                                                                                                                                                                                                                                                                                                                                                                                                   | 15                  | 13                                     | 87      |
| <b>Action</b> Employ care navigators or support people to attend appointments                                                                                                                                                                                                                                                                                                                                                                                                                                                                                                                                                                | 15                  | 9                                      | 60      |
| <b>Strategy</b> Ensure health staff support and encourage people engaging in their own healthcare                                                                                                                                                                                                                                                                                                                                                                                                                                                                                                                                            | 17                  | 15                                     | 88      |
| <b>Action</b> Train clinic drivers, receptionists and other staff about the importance of skin sores and sore throat so these conditions are never minimised or dismissed                                                                                                                                                                                                                                                                                                                                                                                                                                                                    | 15                  | 13                                     | 87      |
| <b>Action</b> Train health staff to validate or congratulate people who present for assessment and treatment of skin sores and sore throat                                                                                                                                                                                                                                                                                                                                                                                                                                                                                                   | 15                  | 13                                     | 80      |
| <b>Action</b> Train health staff to provide clear information and encouragement about why skin sores/sore throat need treatment                                                                                                                                                                                                                                                                                                                                                                                                                                                                                                              | 15                  | 10                                     | 67      |
| <b>Strategy*</b> Establish meaningful community governance mechanisms for skin sore and sore throat control strategies                                                                                                                                                                                                                                                                                                                                                                                                                                                                                                                       | 17                  | 14                                     | 82      |
| <b>Strategy*</b> Develop peer support mechanisms for people at risk of ARF and RHD to learn more about Strep A infections and treatment                                                                                                                                                                                                                                                                                                                                                                                                                                                                                                      | 16                  | 11                                     | 69      |
| <b>Strategy*</b> Teach and empower people to do their own skin sore dressings                                                                                                                                                                                                                                                                                                                                                                                                                                                                                                                                                                | 16                  | 9                                      | 56      |
| <b>Strategy*</b> Develop digital tools like apps or reminder texts to support self-management of skin sores and sore throat                                                                                                                                                                                                                                                                                                                                                                                                                                                                                                                  | 16                  | 6                                      | 38      |

|                                                                                                                                                                            |    |    |     |
|----------------------------------------------------------------------------------------------------------------------------------------------------------------------------|----|----|-----|
| <b>Concept</b> Health promotion to increase assessment and treatment of sore throat and skin sores                                                                         | 22 | 18 | 82  |
| <b>Strategy*</b> Ensure health promotion occurs in local Aboriginal and Torres Strait Island languages                                                                     | 16 | 16 | 100 |
| <b>Strategy</b> Targeted public education on the specific risks of skin sores and sore throat                                                                              | 17 | 16 | 94  |
| <b>Action</b> Teach parents and families about the cause and risks of skin sores and sore throat through community events                                                  | 16 | 16 | 100 |
| <b>Action</b> Train health care workers to educate children and families about the risk of skin sore and sore throat                                                       | 16 | 15 | 94  |
| <b>Action</b> Teach children about the cause and risks of skin sores and sore throat at school                                                                             | 16 | 14 | 88  |
| <b>Strategy</b> General public education to 'denormalise' skin sores                                                                                                       | 17 | 12 | 71  |
| <b>Strategy</b> General public education about skin sores, sore throat, ARF and RHD                                                                                        | 17 | 11 | 65  |
| <b>Strategy</b> General public education on germs causing disease                                                                                                          | 17 | 9  | 53  |
| <b>Concept</b> Provide practical or physical support to assist people to access health services*                                                                           | 16 | 14 | 88  |
| <b>Strategy</b> Improve transport for people to attend clinic for skin sores and sore throat                                                                               | 14 | 12 | 86  |
| <b>Action</b> Fund primary care clinics to provide transport for people who need assessment and treatment                                                                  | 12 | 11 | 92  |
| <b>Action</b> provide education for temporary care providers (boarding schools, out of home carers) on the need for assessment and treatment of skin sores and sore throat | 14 | 9  | 64  |
| <b>Strategy*</b> Develop systems for people to send photos of skin sores or communicate with the clinic from outreach services                                             | 14 | 8  | 57  |
| <b>Strategy</b> Extend clinic opening hours so that people can attend for assessment/treatment for more the day                                                            | 16 | 9  | 56  |
| <b>Concept</b> Make health care delivery more acceptable*                                                                                                                  | 16 | 13 | 81  |
| <b>Strategy</b> Provide culturally acceptable care                                                                                                                         | 12 | 12 | 100 |
| <b>Action</b> Routinely ask patients/consumers whether care experience culturally appropriate                                                                              | 12 | 11 | 92  |
| <b>Action</b> Provide health staff training on how to deliver culturally appropriate care                                                                                  | 12 | 10 | 83  |
| <b>Action</b> Use or develop new terms for skin sores and sore throat in Aboriginal and Torres Strait Islander languages                                                   | 12 | 10 | 83  |
| <b>Action</b> Teach health staff Aboriginal or Torres Strait Islander languages                                                                                            | 12 | 7  | 58  |
| <b>Strategy</b> Increase the amount of care delivered by Aboriginal and Torres Strait Islander people                                                                      | 12 | 12 | 100 |
| <b>Action</b> Develop workforce strategies to recruit, train and retain Aboriginal and Torres Strait Islander people in primary health care                                | 12 | 12 | 100 |
| <b>Action</b> Amend legislation to allow Aboriginal and Torres Strait Islander Health Practitioners to give medications for sore throat/skin sores in all jurisdictions    | 12 | 11 | 100 |
| <b>Action*</b> Work with the community to recruit local Aboriginal and Torres Strait Islander staff                                                                        | 16 | 15 | 94  |
| <b>Action*</b> Develop support roles for Aboriginal and Torres Strait Islander people without formal health worker training                                                | 16 | 15 | 94  |
| <b>Strategy*</b> Provide formal, high quality, unconscious bias and cultural competence training for staff                                                                 | 16 | 9  | 56  |
| <b>Strategy*</b> Facilitate use of traditional medications for skin sores and sore throat alongside guideline-based care                                                   | 16 | 8  | 50  |
| <b>Concept</b> Improve treatment of scabies, which can cause skin damage, which contributes to skin sores*                                                                 | 16 | 13 | 81  |
| (Strategy Improve treatment of scabies, which can cause skin damage, which contributes to skin sores)                                                                      | 16 | 13 | 81  |
| <b>Action</b> Develop systems for household outreach for assessment and treatment when someone from the household is diagnosed with scabies                                | 15 | 15 | 100 |
| <b>Action</b> Ensure everyone attending the clinic gets treatment for scabies and any skin sores present                                                                   | 15 | 14 | 93  |
| <b>Strategy*</b> Provide or advocate for housing and environmental health services for people with scabies and skin sores                                                  | 16 | 14 | 88  |
| <b>Action*</b> Provide or advocate for facilities for people with scabies to wash clothes and bedding                                                                      | 16 | 12 | 75  |
| <b>Strategy*</b> Develop specific resources about scabies and use of treatments in local language                                                                          | 16 | 13 | 81  |
| <b>Concept</b> Make it easier for people to access assessment and treatment of skin sores/sore throat*                                                                     | 17 | 12 | 75  |

|                                                                                                           |    |    |    |
|-----------------------------------------------------------------------------------------------------------|----|----|----|
| <b>Concept</b> Train or educate health care staff*                                                        | 16 | 12 | 75 |
| <b>Concept</b> Make assessment and treatment of skin sores/sore throat available in more places*          | 16 | 11 | 69 |
| <b>Concept</b> Support quality of care delivery*                                                          | 16 | 9  | 56 |
| <b>Concept</b> Improve clinical guidelines on the assessment and management of skin sores and sore throat | 20 | 11 | 55 |
| <b>Concept</b> Improve service delivery by reducing costs to clinics                                      | 20 | 9  | 45 |
| <b>Concept</b> Actively work to identify people with skin sores*                                          | 16 | 6  | 38 |
| <b>Concept</b> Reduce the costs for people seeking assessment/treatment of skin sores/sore throat         | 20 | 6  | 30 |
